# Supplementary material for: Rhizosphere bacterial characteristics reveal the invasive advantage of Sphagneticola trilobata compared to the greening grass Axonopus compressus
Source: Research Square preprint supplement (doi:10.21203/rs.3.rs-7532857/v1), 2025-09-30
Supplement: Supplementary file 1 [file 8ffa44f9c1f0d76ab4e87ae6.docx]

Table S1. Quantitative characteristics of different soil types bacterial communities at various taxonomic levels.

| Group | Kingdom | Phylum | Class | Order | Family | Genus | Specise | OTUs |
| --- | --- | --- | --- | --- | --- | --- | --- | --- |
| SRS | 2 | 42 | 141 | 359 | 581 | 1116 | 1736 | 20706 |
| SSS | 2 | 44 | 146 | 365 | 576 | 1091 | 1673 | 20799 |
| ARS | 2 | 46 | 143 | 367 | 575 | 1102 | 1680 | 19895 |
| ASS | 2 | 45 | 148 | 374 | 579 | 1098 | 1673 | 21808 |
| CK | 2 | 46 | 147 | 373 | 578 | 1092 | 1653 | 19295 |
| Total | 2 | 54 | 164 | 412 | 654 | 1272 | 2002 | 31172 |


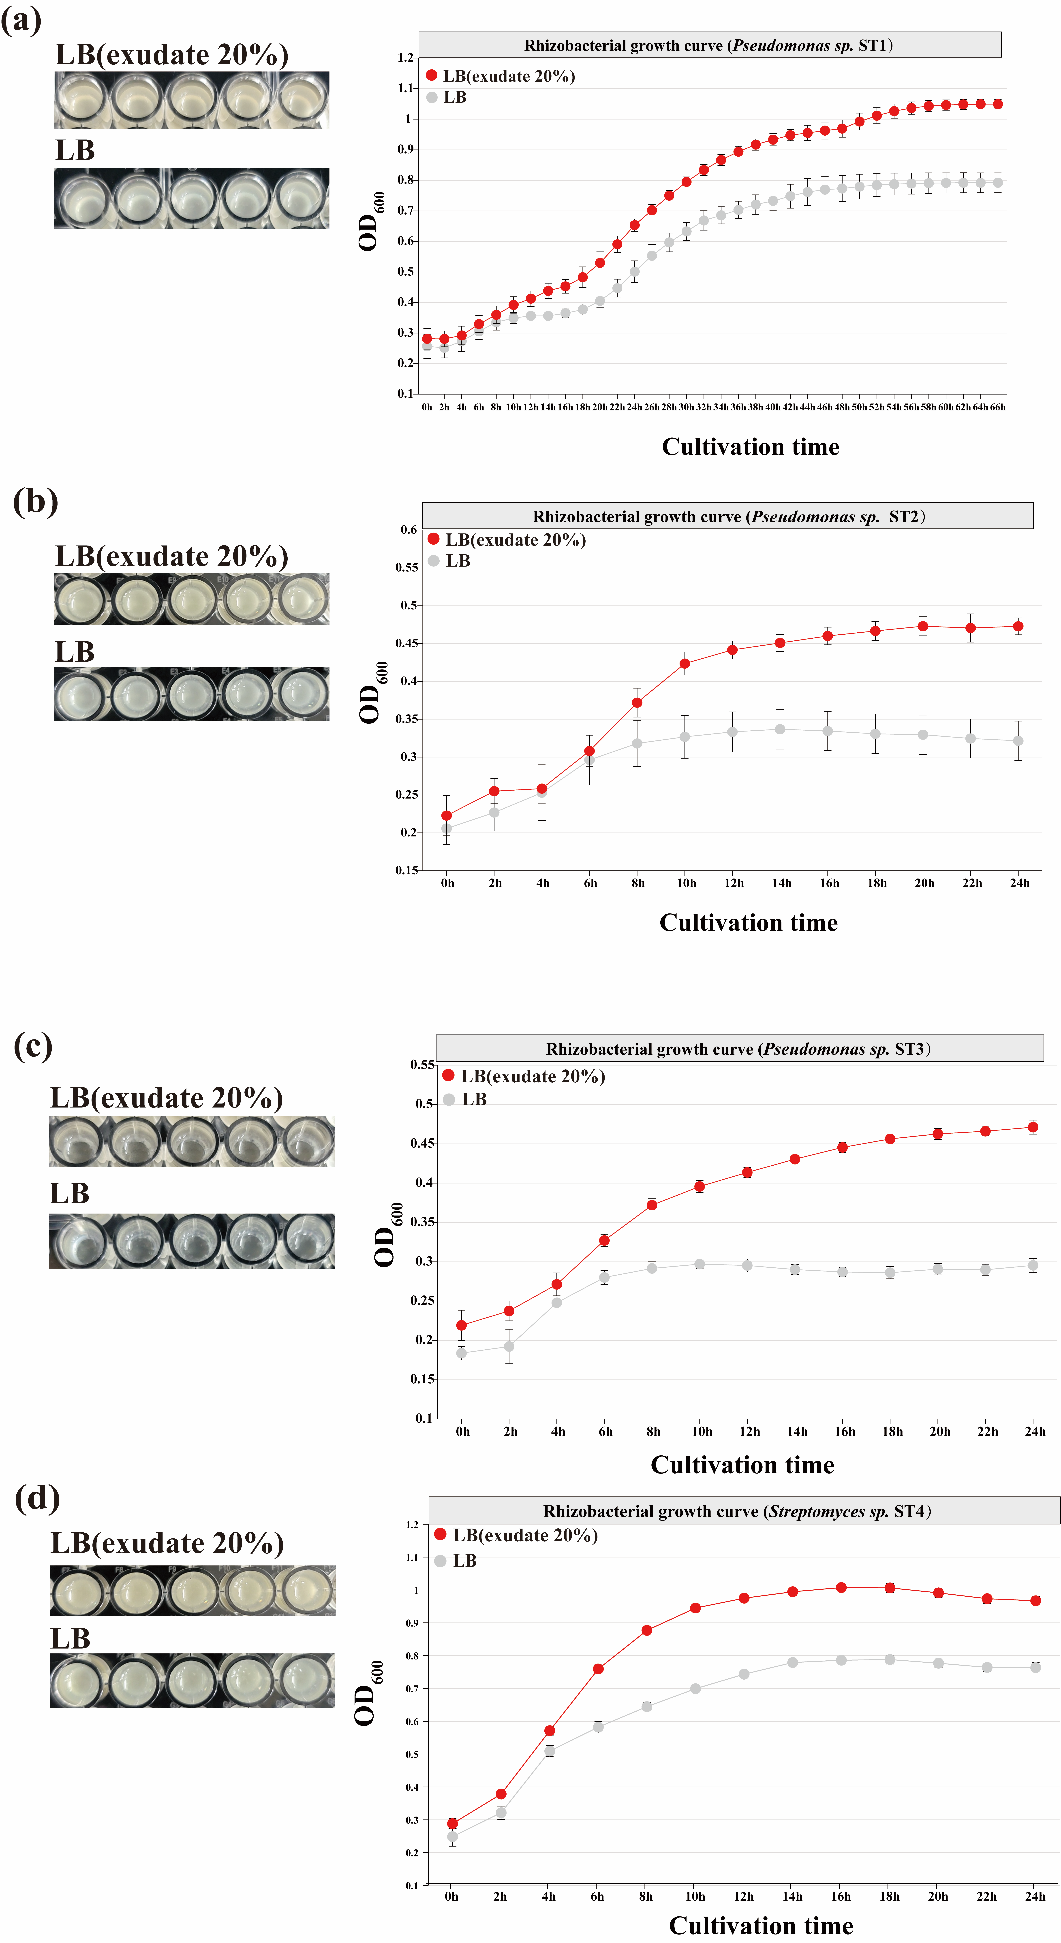


Figure S1. Growth curves of ST1-4 strain under different conditions.(a)ST-1; (b)ST-2; (c)ST-3; (d)ST-4.


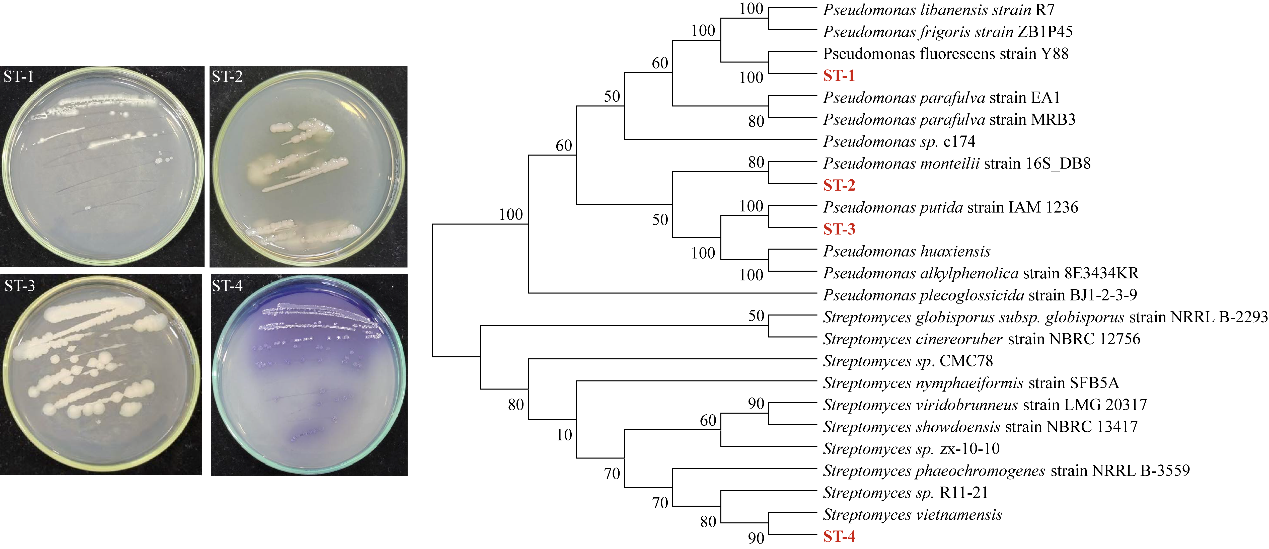


Figure S2 Plate morphology of strain ST1-4 and phylogenetic analysis based on 16S rDNA


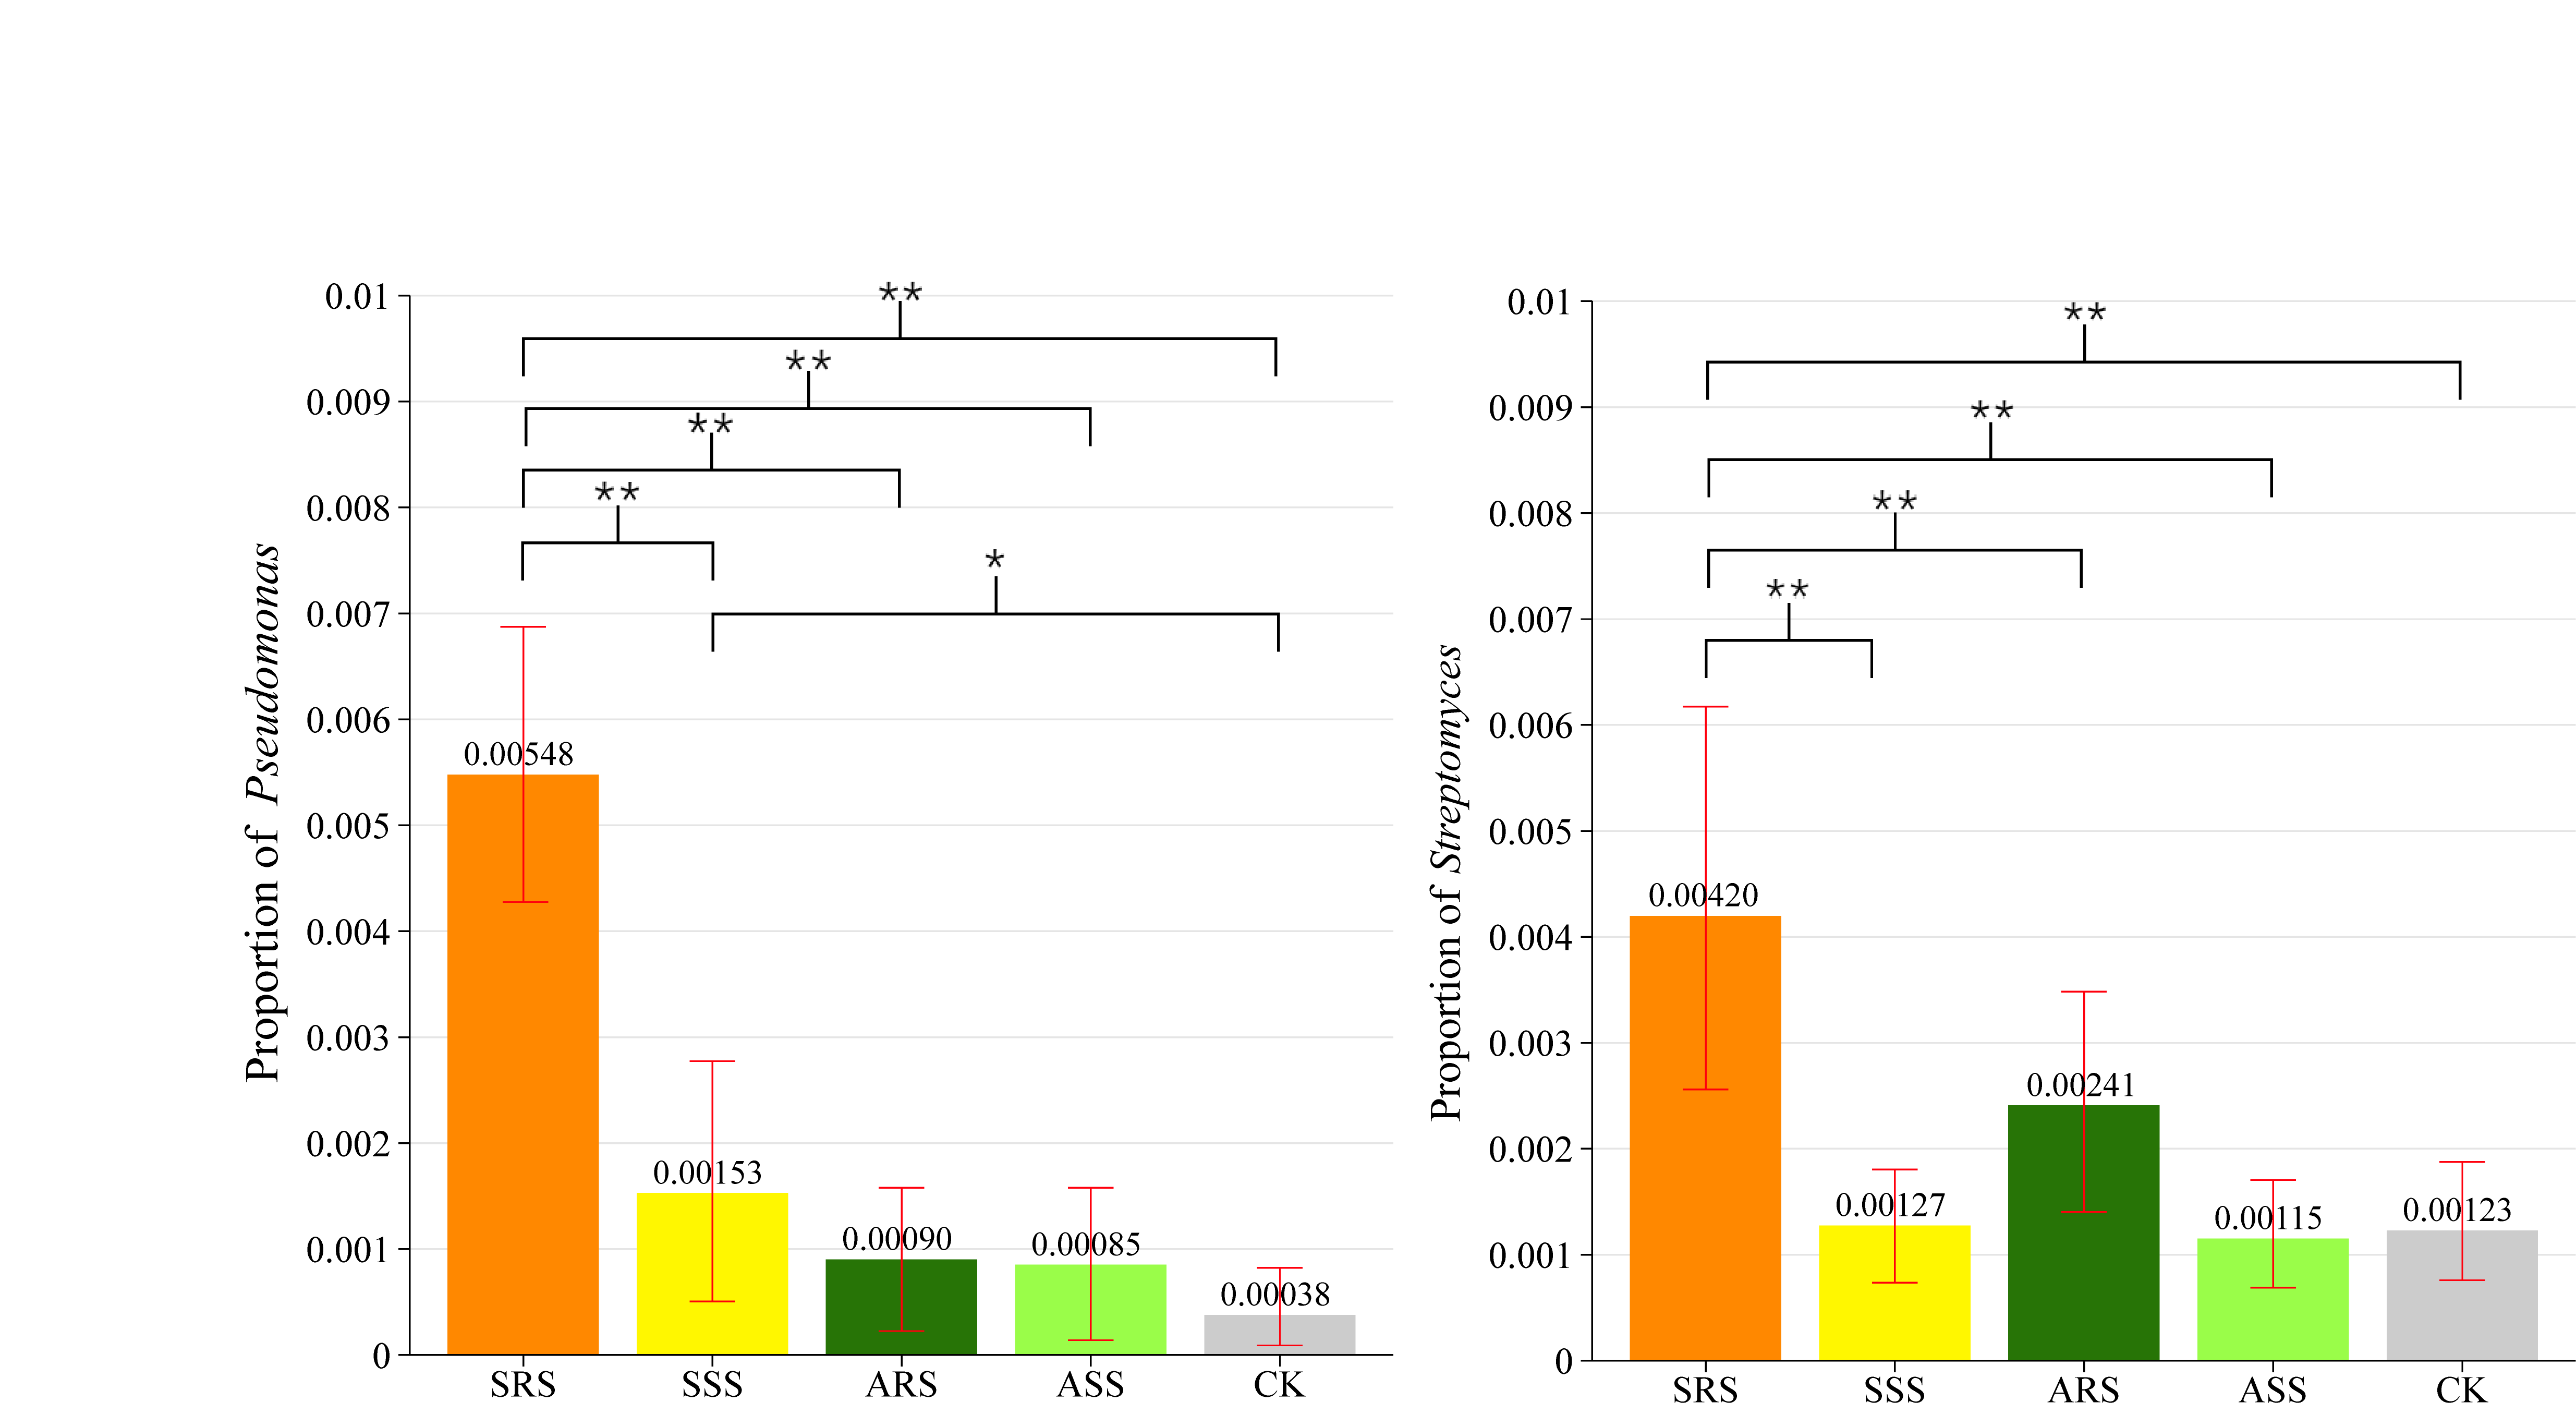


Figure S3. The proportion of *Pseudomonas* and *Streptomyces* in different soil samples.


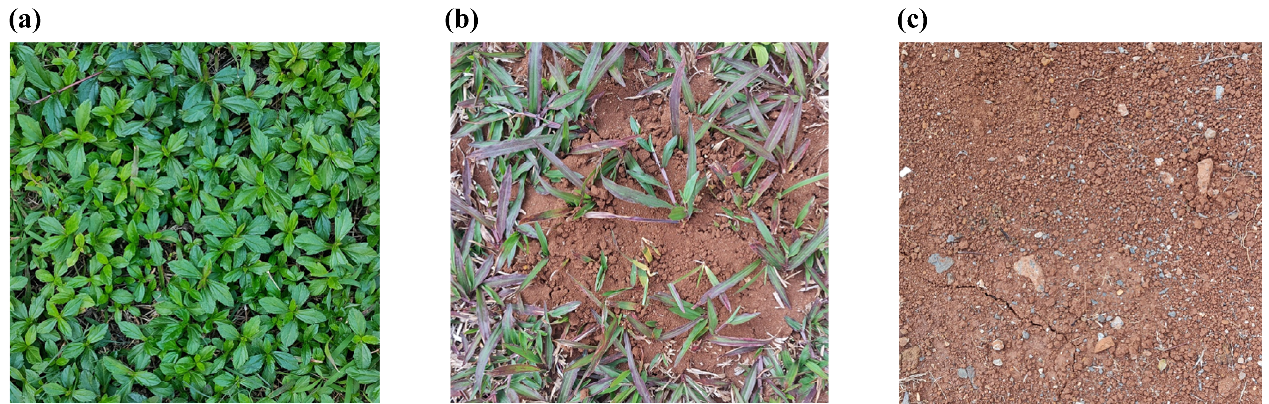


Figure S4. Realistic photos of different soil types. (a) *S.* *trilobata*; (b) *A. compressus*; (c) adjacent bulk soil.
